# Supplementary material for: 3D printed gelatin/hydroxyapatite scaffolds for stem cell chondrogenic differentiation and articular cartilage repair
Source: Royal Society of Chemistry journal article supplement (doi:10.1039/d0bm02103b), 2021-01-01
Supplement: d0bm02103b1.pdf [file d0bm02103b1.pdf]

## 3D Printed Gelatin/Hydroxyapatite Scaffolds for Stem Cell Chondrogenic Differentiation and Articular Cartilage Repair

Jianghong Huang <sup>a, b, †</sup>, Zhiwang Huang <sup>a, †</sup>, Yujie Liang <sup>b, c, †</sup>, Weihao Yuan <sup>d</sup>, Liming Bian <sup>d</sup>, Li Duan <sup>a, f</sup>, Zhibin Rong <sup>e</sup>, Jianyi Xiong <sup>a, \*</sup>, Daping Wang <sup>a, f, g, \*</sup>, Jiang Xia <sup>b, \*</sup>

<sup>a</sup> Department of Orthopedics, Shenzhen Intelligent Orthopaedics and Biomedical Innovation Platform, Guangdong Artificial Intelligence Biomedical Innovation Platform, Shenzhen Second People's Hospital, the First Affiliated Hospital of Shenzhen University Health Science Center, Shenzhen, China, 518035.

<sup>b</sup> Department of Chemistry, and Center for Cell & Developmental Biology, School of Life Sciences, the Chinese University of Hong Kong, Shatin, Hong Kong SAR, China. <sup>c</sup> Shenzhen Kangning Hospital, Shenzhen Mental Health Center, Shenzhen, Guangdong, China, 518020. <sup>d</sup> Department of Biomedical Engineering, the Chinese University of Hong Kong, Shatin, Hong Kong SAR, China. <sup>e</sup> Shijiazhuang Maternity and Child Health Hospital, Shijiazhuang, Hebei, China, 050093. <sup>f</sup> Guangzhou Medical University, Guangzhou, Guangdong, China, 511436. <sup>g</sup> Department of Biomedical Engineering, Southern University of Science and Technology, Shenzhen, China, 518055.

<sup>†</sup> J. H., Z. H. and Y. L. contributed equally to this work.

\* To whom correspondence may be addressed. Email: Jianyi Xiong, [jianyixiong@126.com](mailto:jianyixiong@126.com), Daping Wang, [wangdp@mail.sustech.edu.cn](mailto:wangdp@mail.sustech.edu.cn), Jiang Xia, [jiangxia@cuhk.edu.hk](mailto:jiangxia@cuhk.edu.hk).

## Contents

| Items                                                                                                                         | Page No. |
|-------------------------------------------------------------------------------------------------------------------------------|----------|
| <b>Table S1.</b> The score chart of International Cartilage Repair Society (ICRS) macroscopic evaluation of cartilage repair. | 3        |
| <b>Table S2.</b> The score chart of ICRS visual histological assessment scale.                                                | 4        |
| <b>Table S3.</b> Primers used for RT-qPCR analysis.                                                                           | 5        |
| <b>Figure S1.</b> Rheological properties of the gelatin/HAP scaffolds with different composition of HAP.                      | 6        |
| <b>Figure S2.</b> Physical properties of the scaffolds: swelling and moisture content.                                        | 7        |
| <b>Figure S3.</b> IR spectra of the gelatin scaffold, gelatin/HAP scaffold and HAP alone.                                     | 8        |
| <b>Figure S4.</b> Western blot analysis of the protein expression level on different scaffolds.                               | 9        |
| <b>Figure S5.</b> Histological analysis of the cell culture on different scaffolds <i>in vitro</i> .                          | 10       |
| <b>Figure S6.</b> Surgical procedures of the cartilage damage and scaffold/MSC transplantation.                               | 11       |
| <b>Figure S7.</b> Immunohistochemical staining of collagen II.                                                                | 12       |
| <b>Figure S8.</b> Immunohistochemical staining for collagen X and MMP-13 showing lower expression in Group III.               | 13       |

**Table S1.** The score chart of International Cartilage Repair Society (ICRS) macroscopic evaluation of cartilage repair.

| <b>Categories</b>                                                                            | <b>Scores</b> |
|----------------------------------------------------------------------------------------------|---------------|
| <b>Degree of defect repair</b>                                                               |               |
| In level with surrounding cartilage                                                          | 4             |
| 75% repair of defect depth                                                                   | 3             |
| 50% repair of defect depth                                                                   | 2             |
| 25% repair of defect depth                                                                   | 1             |
| No repair of defect depth                                                                    | 0             |
| <b>Integration to border zone</b>                                                            |               |
| Complete integration with surrounding cartilage                                              | 4             |
| Demarcating border-1 mm                                                                      | 3             |
| Three-quarters of graft integrated, one-quarter with a notable border-1 mm in width          | 2             |
| One-half of graft integrated with surrounding cartilage, one-half with a notable border-1 mm | 1             |
| From no contact to one-quarter of graft integrated with surrounding cartilage                | 0             |
| <b>Macroscopic appearance</b>                                                                |               |
| Intact smooth surface                                                                        | 4             |
| Fibrillated surface                                                                          | 3             |
| Small, scattered fissures or cracks                                                          | 2             |
| Several small or few large fissures                                                          | 1             |
| Total degeneration of grafted area                                                           | 0             |
| <b>Overall repair assessment</b>                                                             |               |
| Grade I: normal                                                                              | 12            |
| Grade II: nearly normal                                                                      | 8-11          |
| Grade III: abnormal                                                                          | 4-7           |
| Grade IV: severely abnormal                                                                  | 1-3           |

**Table S2.** The score chart of ICRS visual histological assessment scale.

| <b>Features</b>                                       | <b>Scores</b> |
|-------------------------------------------------------|---------------|
| <b>Surface</b>                                        |               |
| Smooth/continuous                                     | 3             |
| Discontinuities/irregularities                        | 0             |
| <b>Matrix</b>                                         |               |
| Hyaline                                               | 3             |
| Mixture: hyaline/fibrocartilage                       | 2             |
| Fibrocartilage                                        | 1             |
| Fibrous tissue                                        | 0             |
| <b>Cell distribution</b>                              |               |
| Columnar                                              | 3             |
| Mixed/columnar-clusters                               | 2             |
| Clusters                                              | 1             |
| Individual cells/disorganized                         | 0             |
| <b>Cell population viability</b>                      |               |
| Predominantly viable                                  | 2             |
| Partially viable                                      | 1             |
| <10% viable                                           | 0             |
| <b>Subchondral bone</b>                               |               |
| Normal                                                | 3             |
| Increased remodeling                                  | 2             |
| Bone necrosis/granulation tissue                      | 1             |
| Detached/fracture/callus at base                      | 0             |
| <b>Cartilage mineralization (calcified cartilage)</b> |               |
| Normal                                                | 2             |
| Abnormal/inappropriate location                       | 0             |
| <b>Toluidine blue stain</b>                           |               |
| Normal                                                | 4             |
| Slight reduction                                      | 3             |
| Moderate reduction                                    | 2             |
| Severe reduction                                      | 1             |
| No staining                                           | 0             |
| <b>Percent toluidine blue in defect</b>               |               |
| 75–100%                                               | 4             |
| 50–75%                                                | 3             |
| 25–50%                                                | 2             |
| 0–25%                                                 | 1             |
| No toluidine blue staining                            | 0             |
|                                                       | <b>Max 24</b> |

**Table S3.** Primers used for RT-qPCR analysis.

| Gene   | Primer sequences                       |
|--------|----------------------------------------|
| SOX9   | qRT-f: 5'-CGCAACGGCAACTTCCACC-3'       |
|        | qRT-r: 5'-CAGGCCTCACTCTCGAAAGC-3'      |
| COL1A1 | qRT-f: 5'-GTCACCCACCGACCAAGAAACC-3'    |
|        | qRT-r: 5'-AAGTCCAGGCTGTCCAGGGATG-3'    |
| COL2A1 | qRT-f: 5'-CCAACAA GCATGTCTGGTTAGGAG-3' |
|        | qRT-r: 5'-GCAATGCTGTTCTTGCAGTGGTA-3'   |
| ACAN   | qRT-f: 5'-TCGAGGACAGCGAGGCC-3'         |
|        | qRT-r: 5'-TCGAGGGTGTAGCGTGTAGAGA-3'    |
| GAPDH  | qRT-f: 5'-TCCCTGAGCTGAACGGGAAG-3'      |
|        | qRT-r: 5'-GGAGGAGTGGGTGTCGCTGT-3'      |

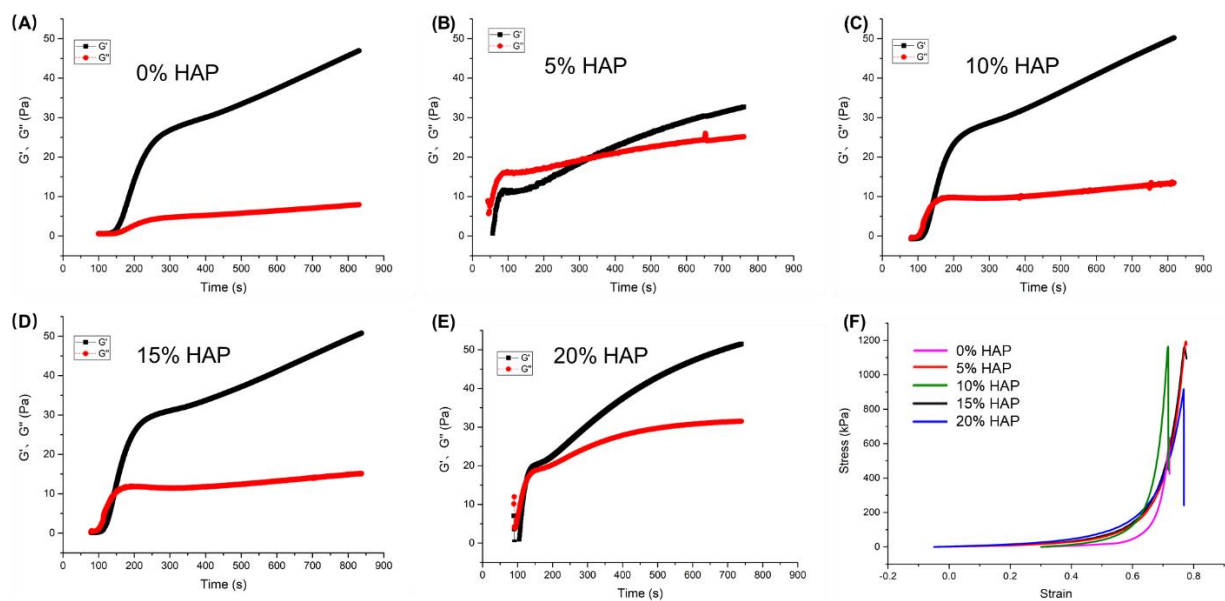

**Figure S1.** Rheological properties of the gelatin/HAP scaffolds with different composition of HAP. (A-E) The time sweeps. (F) Stress-strain curves.

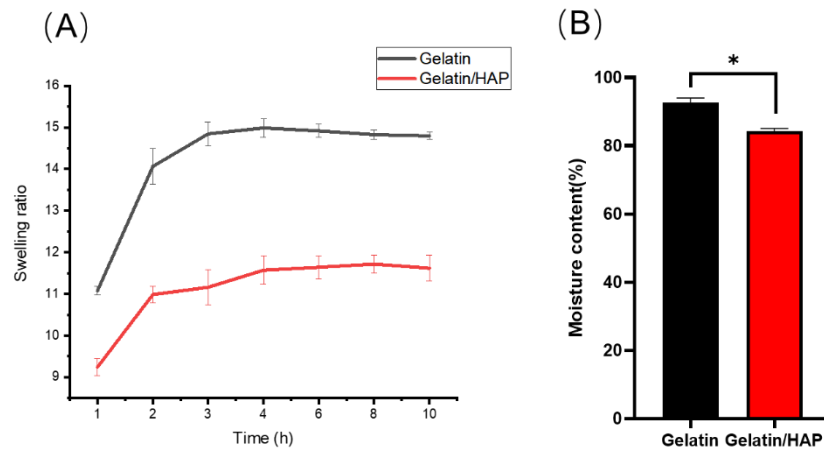

**Figure S2.** Physical properties of the scaffolds: swelling and moisture content. (A) The swelling property of the gelatin scaffold and gelatin/HAP scaffold. (B) The moisture content of the two scaffolds. \*,  $p < 0.05$ .

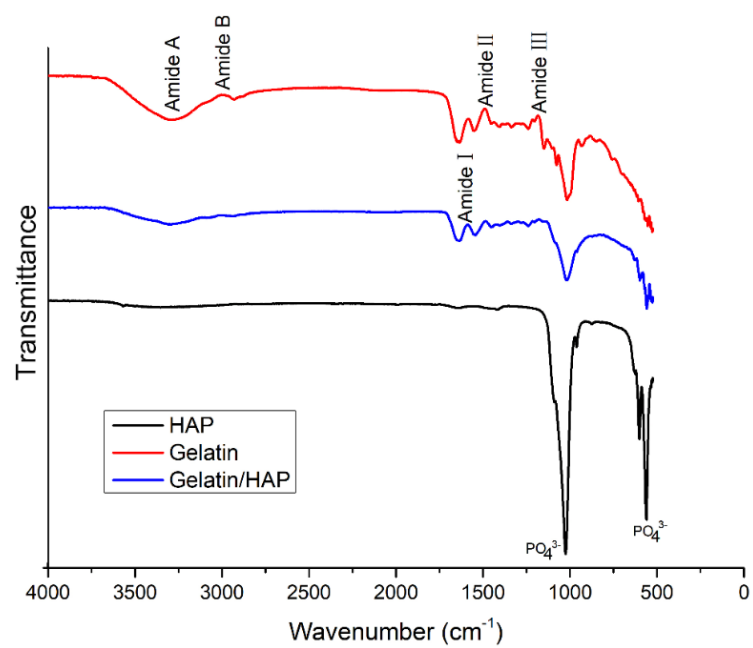

**Figure S3.** IR spectra of the gelatin scaffold, gelatin/HAP scaffold and HAP alone.



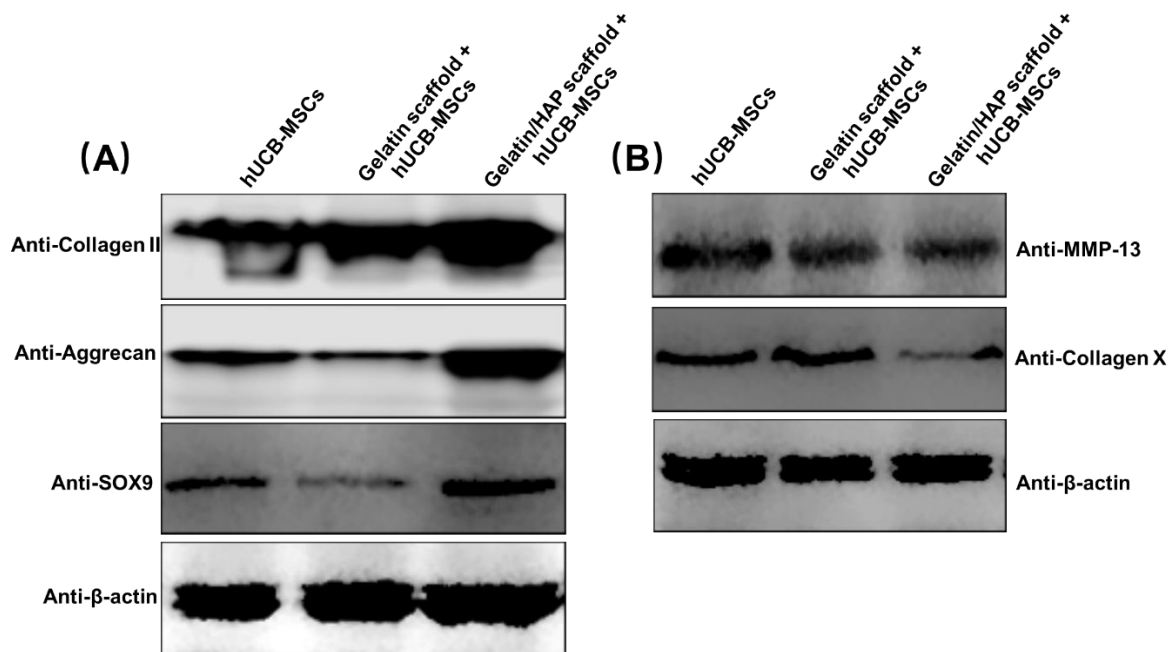

**Figure S4.** Western blot analysis of the protein expression level on different scaffolds. Briefly, hUCB-MSCs were cultured on gelatin or gelatin/HAP scaffolds for 21 days, before the protein levels were analyzed by western blots using anti-collagen II, anti-aggrecan and anti-SOX9 antibodies (A), and anti-MMP-13 and anti-collagen X antibodies (B).

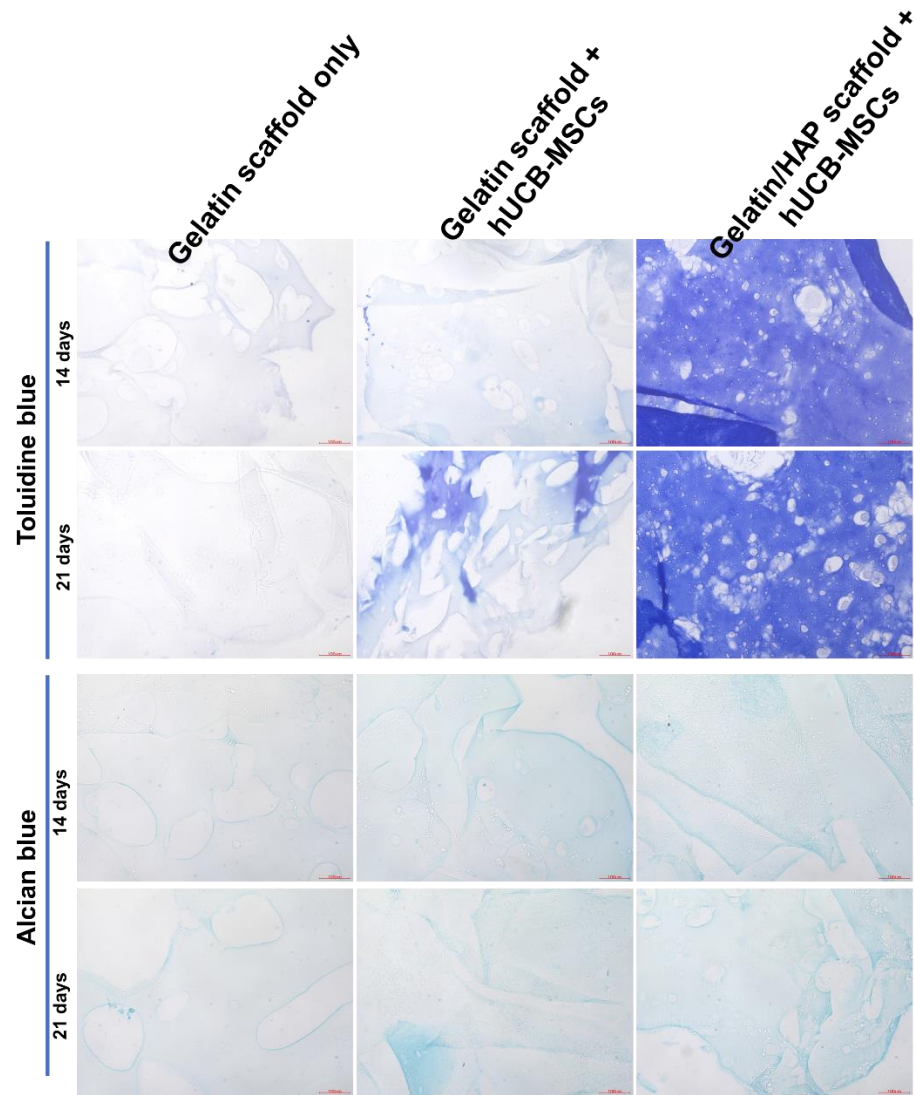

**Figure S5.** Histological analysis of the cell culture on different scaffolds *in vitro*. Briefly, stem cells were seeded on gelatin or gelatin/HAP scaffolds, and stained with Toluidine Blue or Alcian Blue dyes, and imaged. Scale bar, 100  $\mu\text{m}$ .

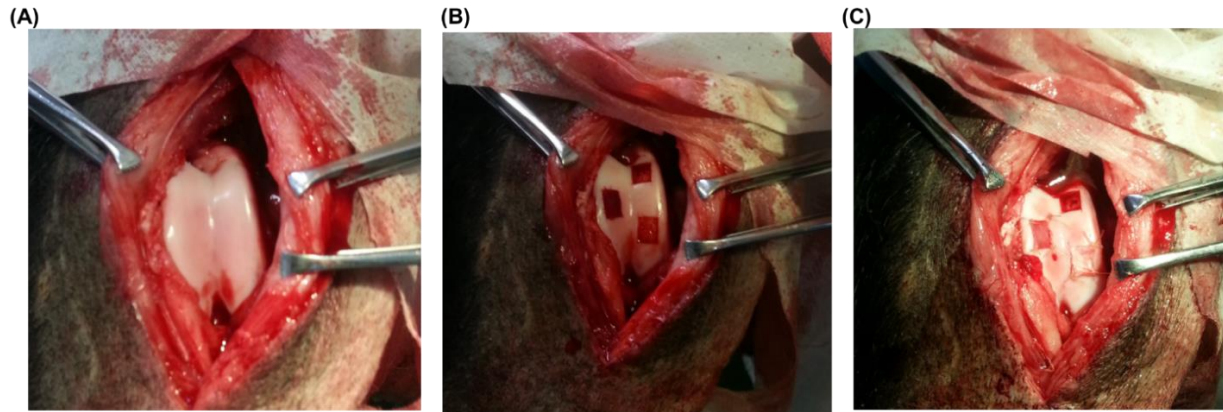

**Figure S6.** Surgical procedures of the cartilage damage and scaffold/MSC transplantation. (A) Exposure of the knee joint of the pig. (B) Cartilage damages after surgery. (C) Transplants into the damage sites.

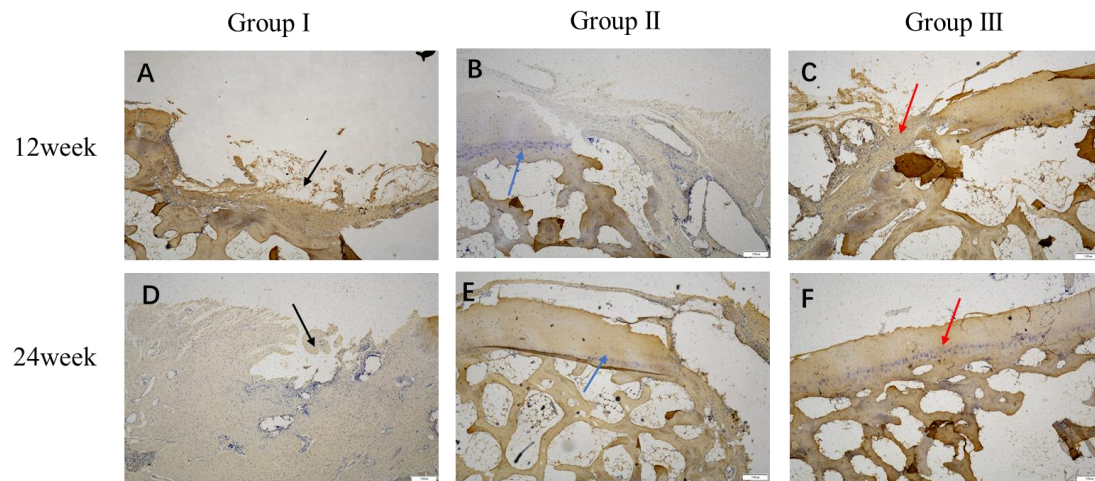

**Figure S7.** Immunohistochemical staining for collagen II. Black arrows indicate the formation of cavities, fibrous tissues or inflammatory tissues. Blue arrows indicate the partially regenerated cartilage tissues. Red arrows indicate fully regenerated cartilage tissues. Scale bar, 100  $\mu\text{m}$ .

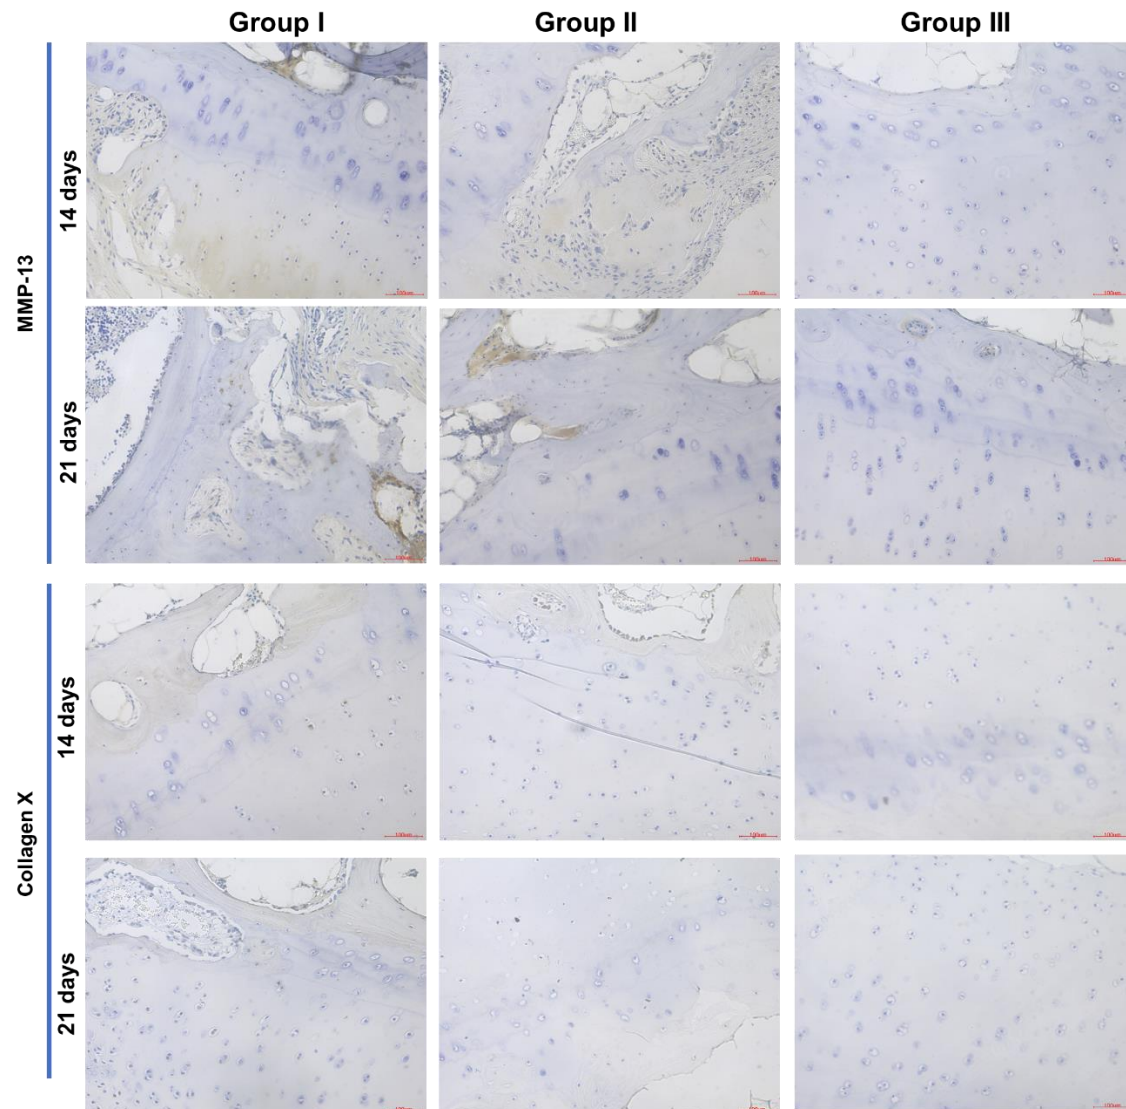

**Figure S8.** Immunohistochemical staining for collagen X and MMP-13 showing lower expression in Group III. Scale bar, 100  $\mu$ m.
